# Supplementary material for: Tobacco drought stress responses reveal new targets for Solanaceae crop improvement
Source: PubMed Central journal article supplement (PMC4485875; doi:10.1186/s12864-015-1575-4), 2015-06-30

# a. Leaf 20 minutes

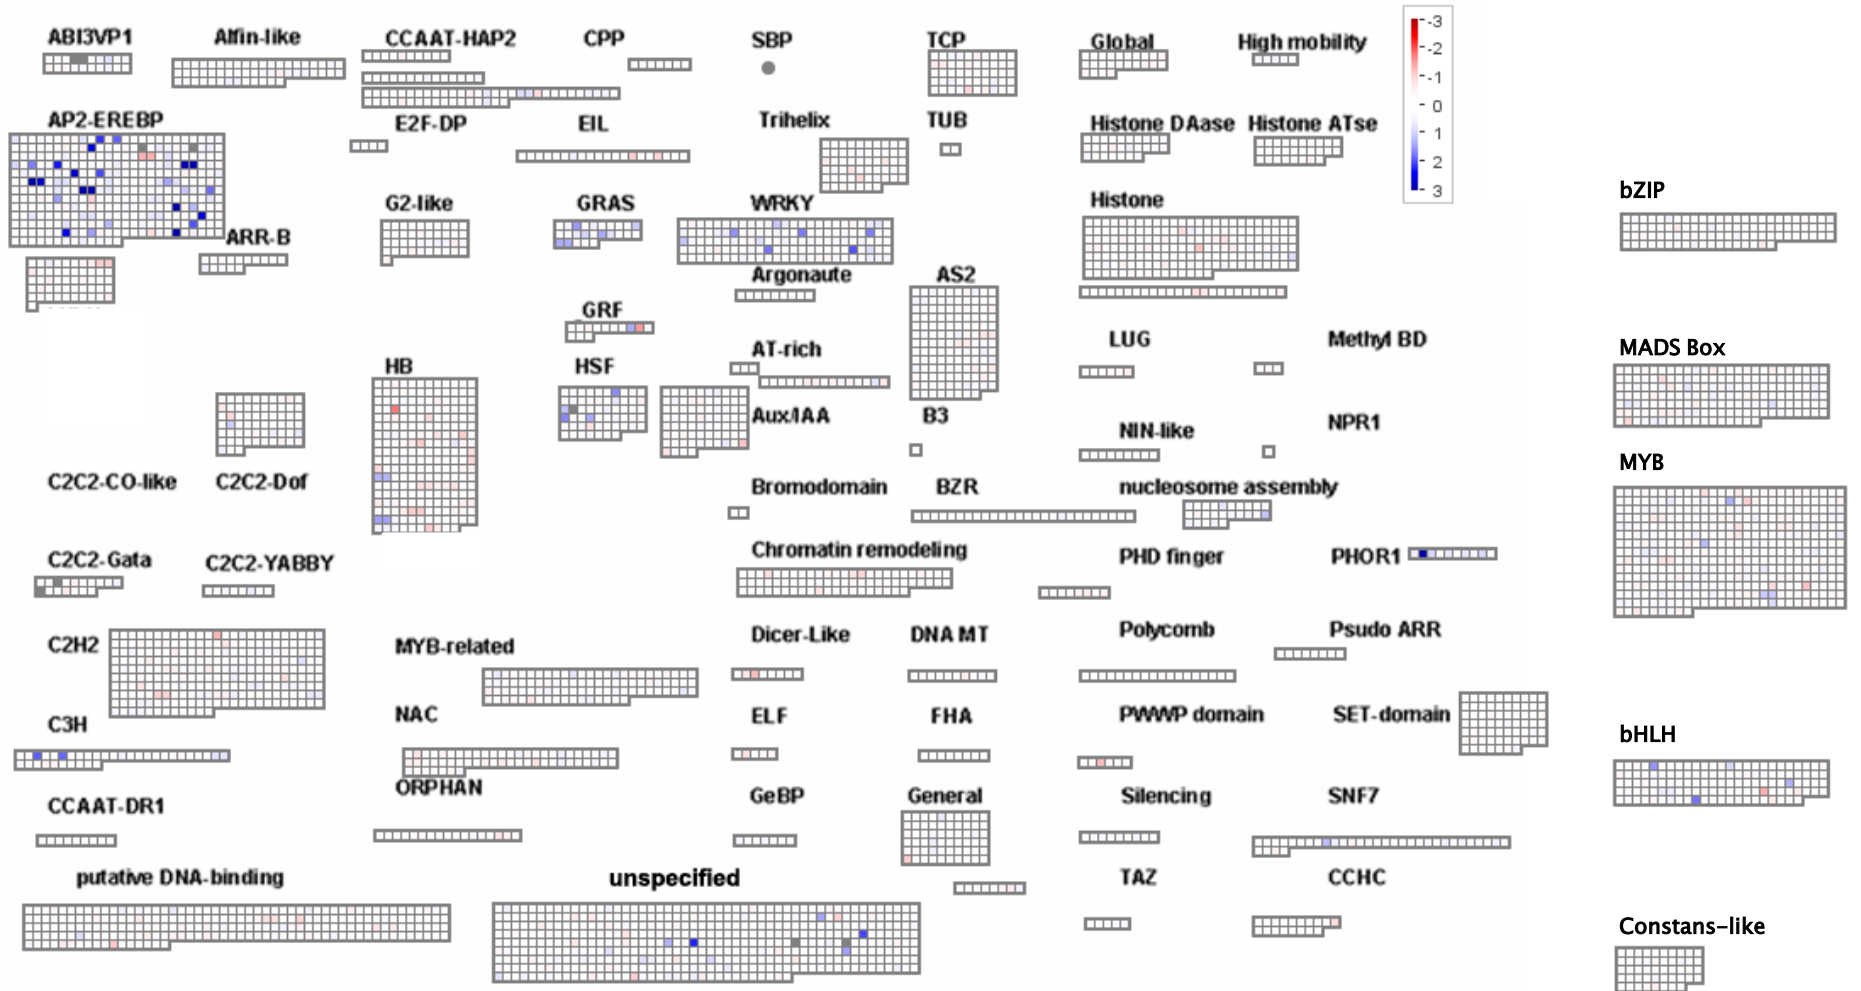

## b. Leaf 40 minutes

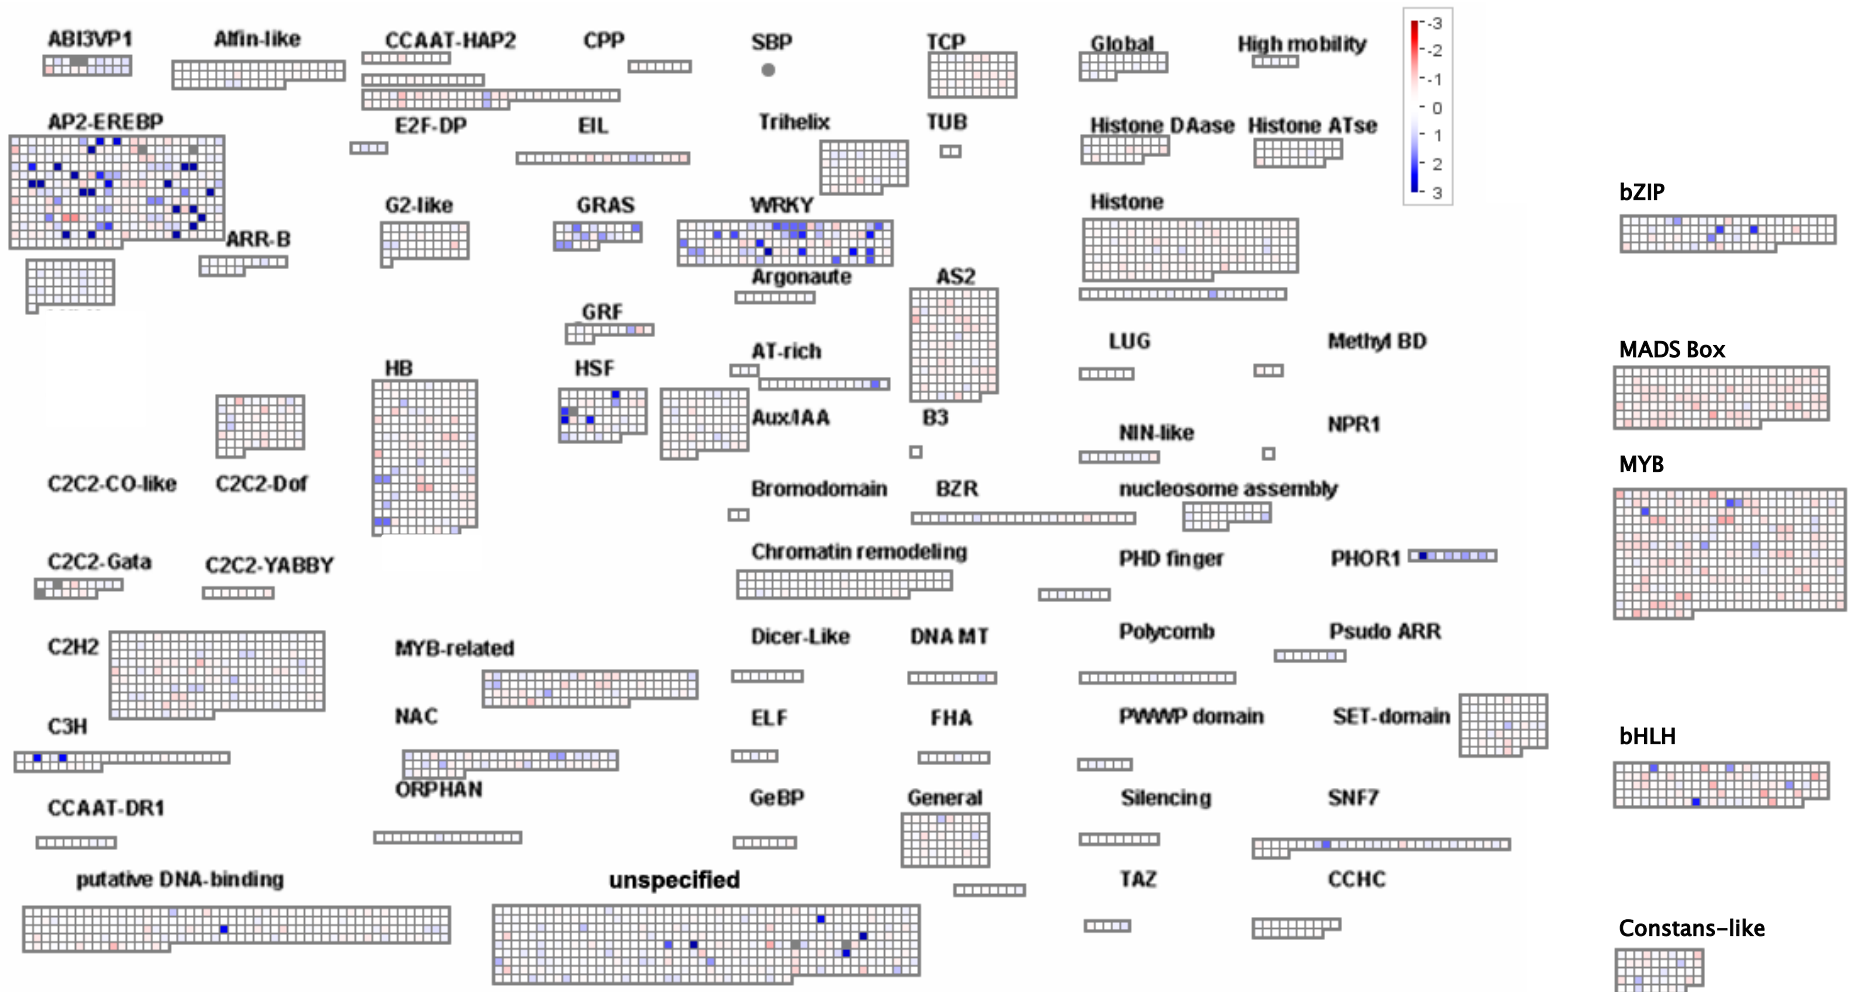

# c. Leaf 1 hour

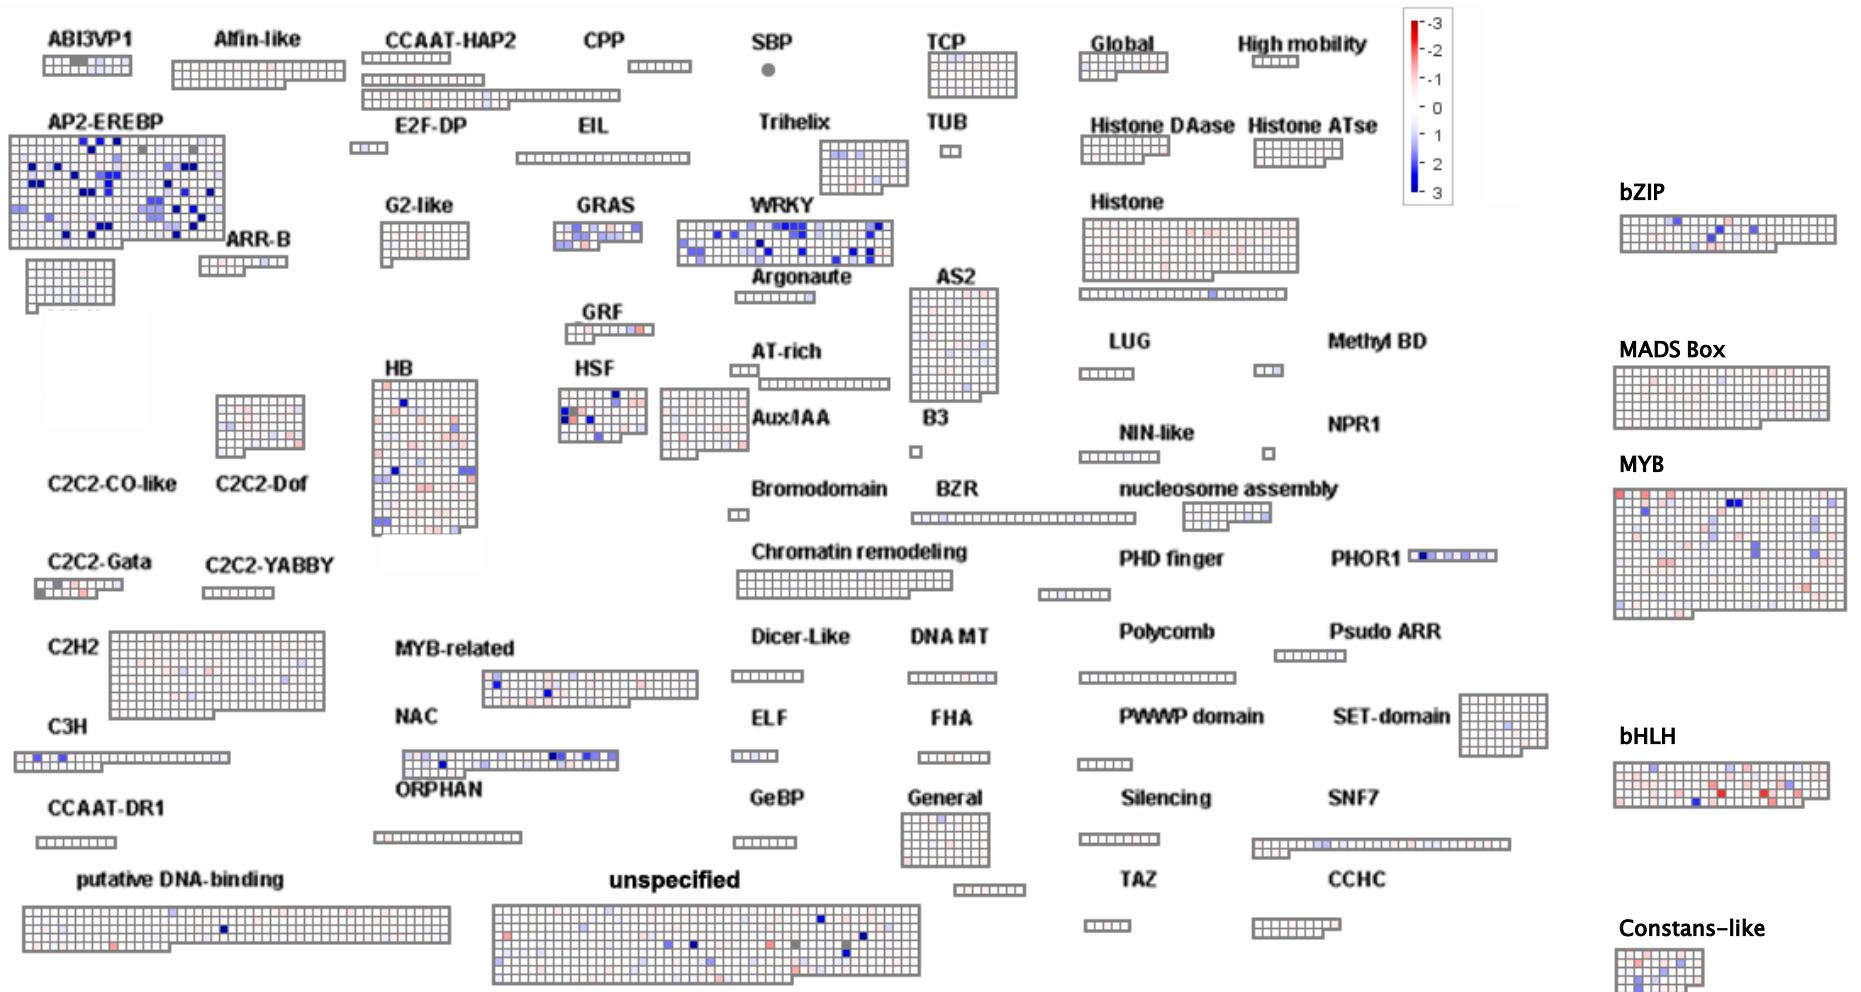

# d. Leaf 2 hours

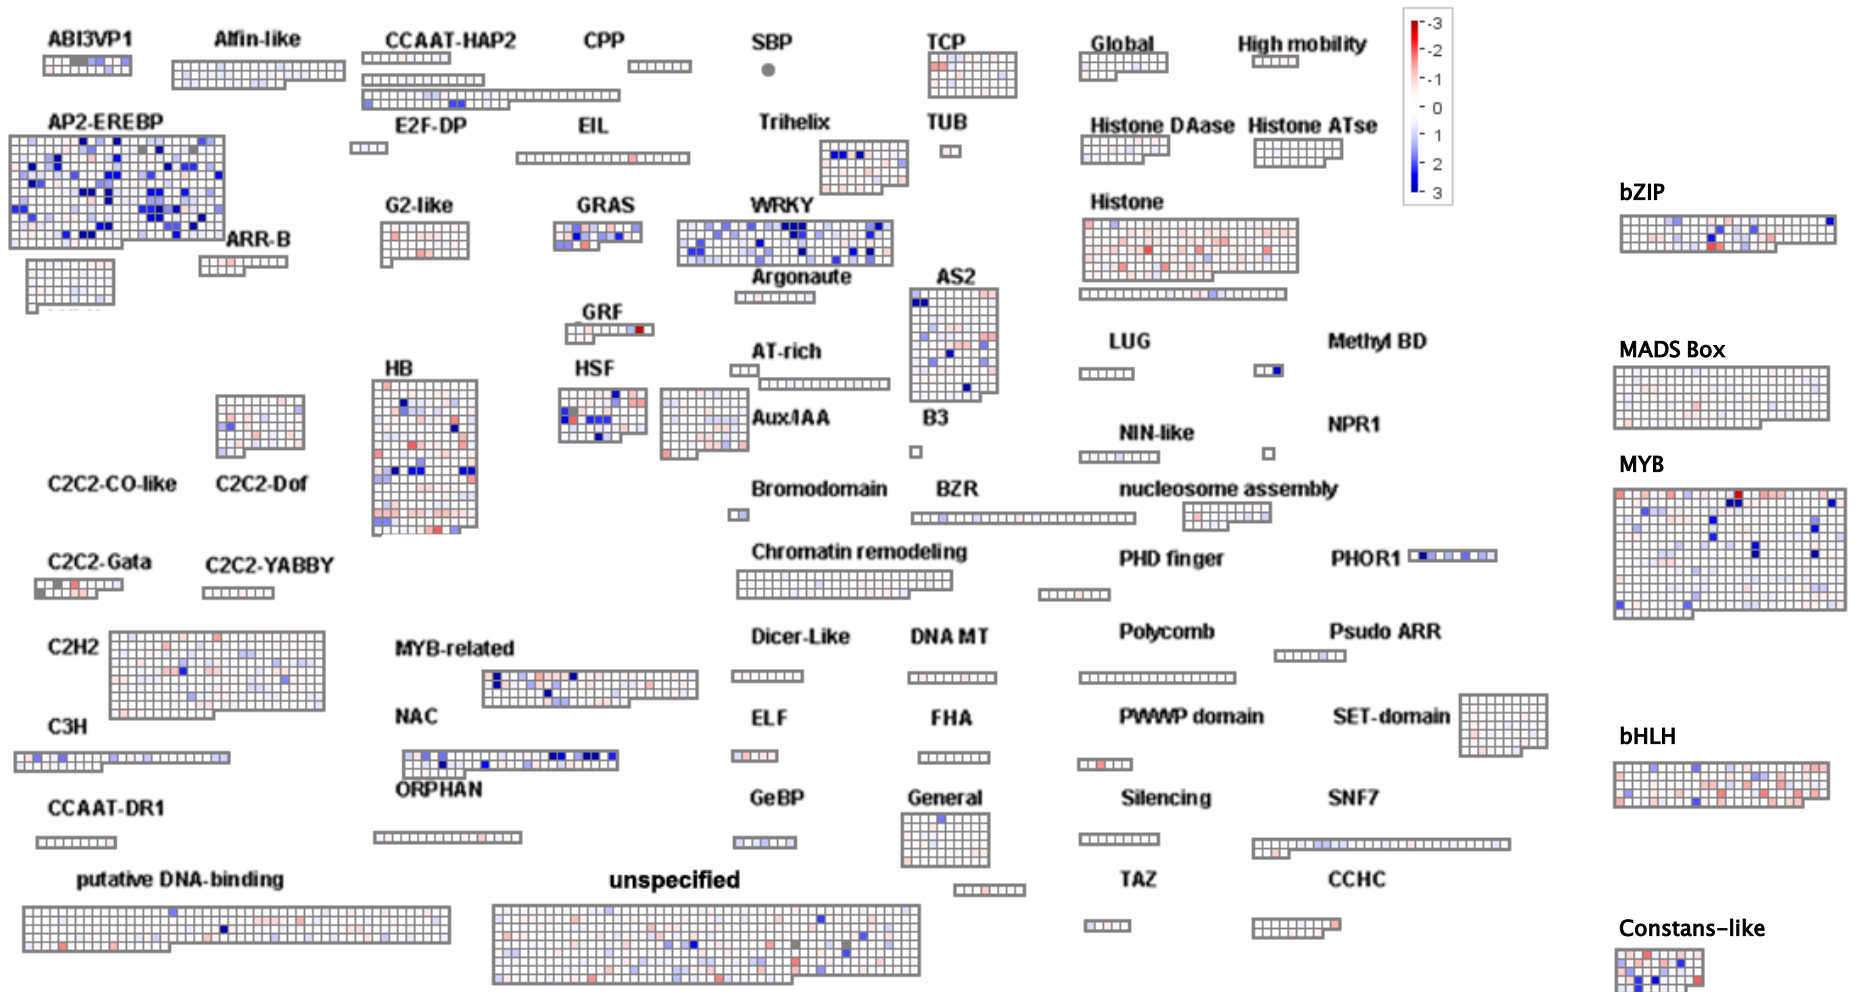

# e. Leaf 4 hours

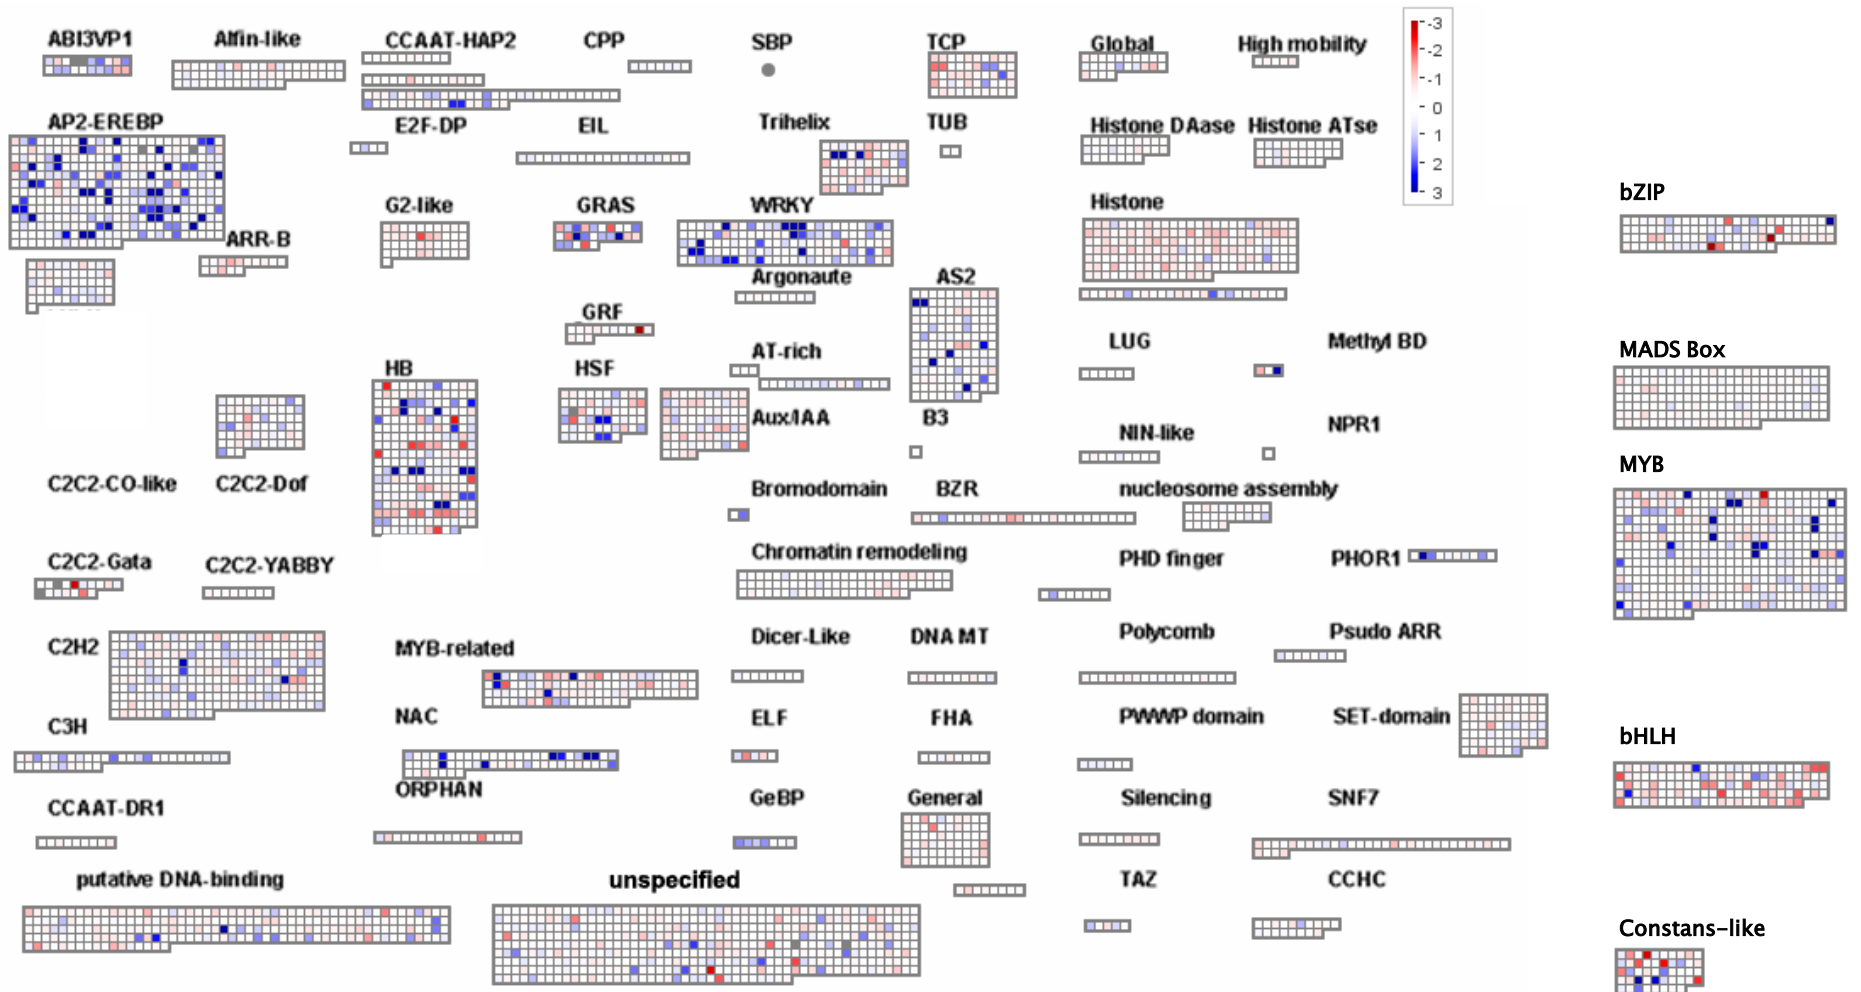

## f. Root 20 minutes

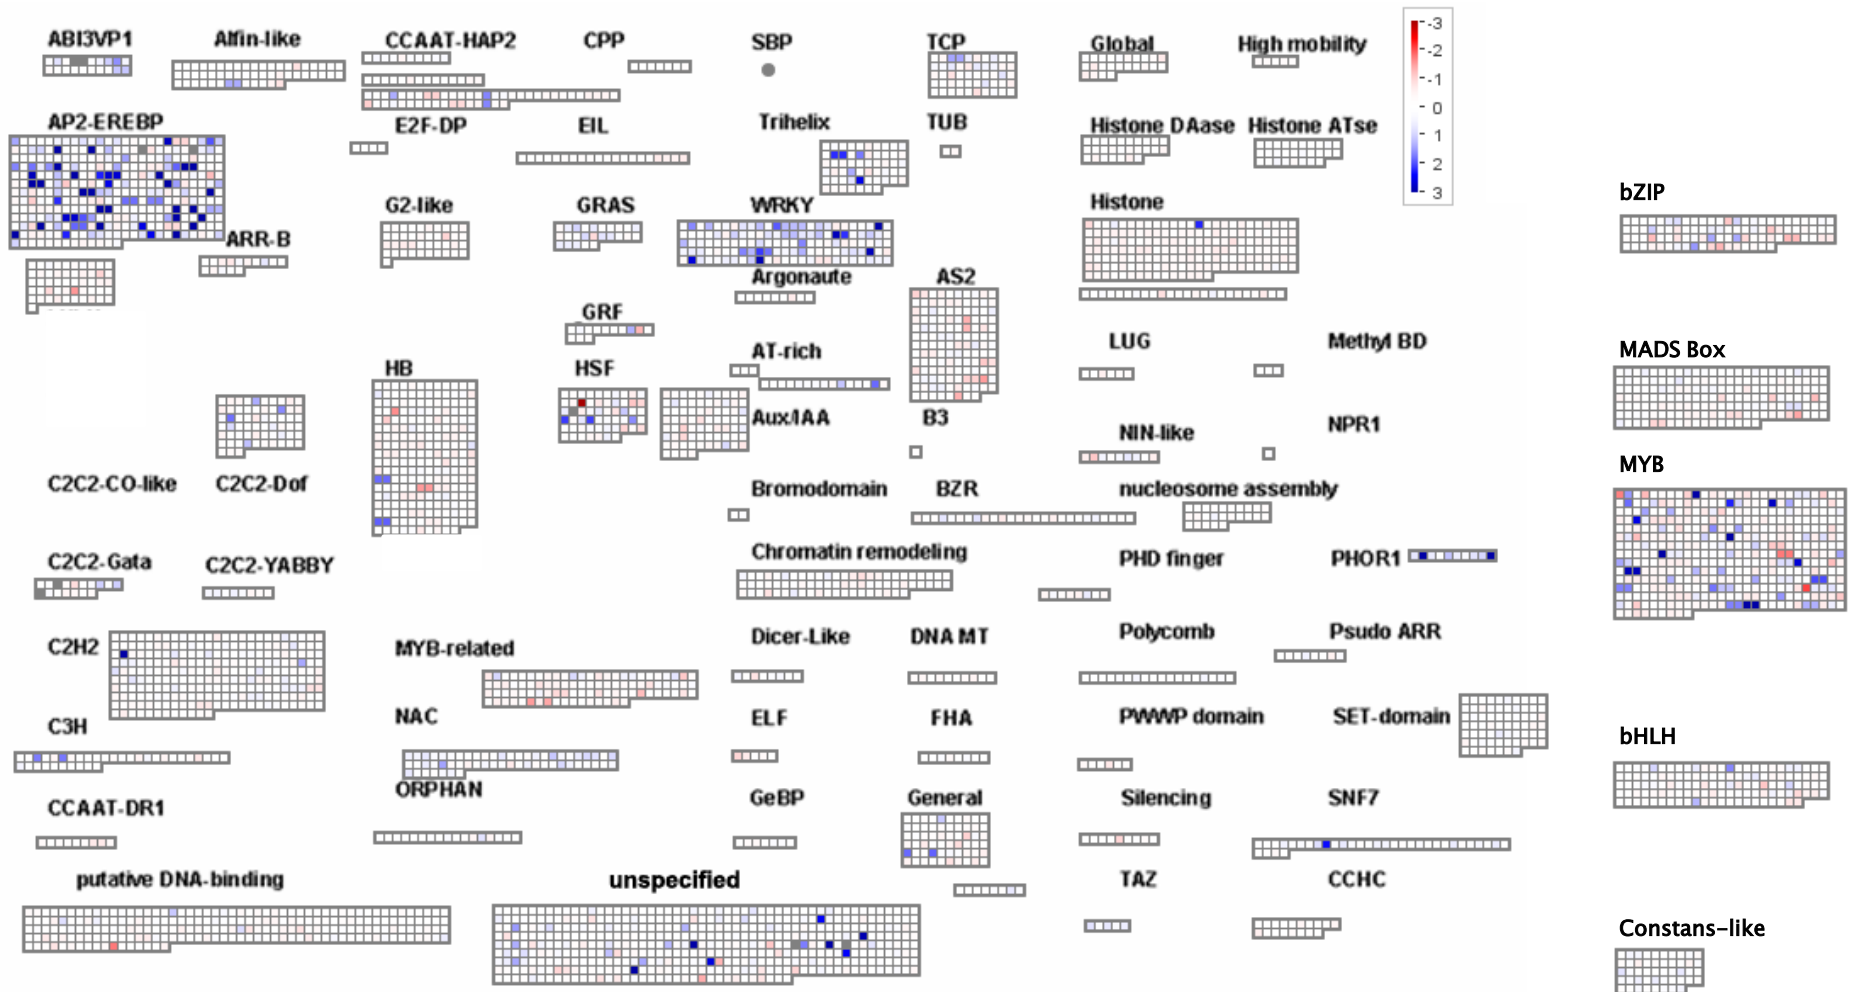

# g. Root 40 minutes

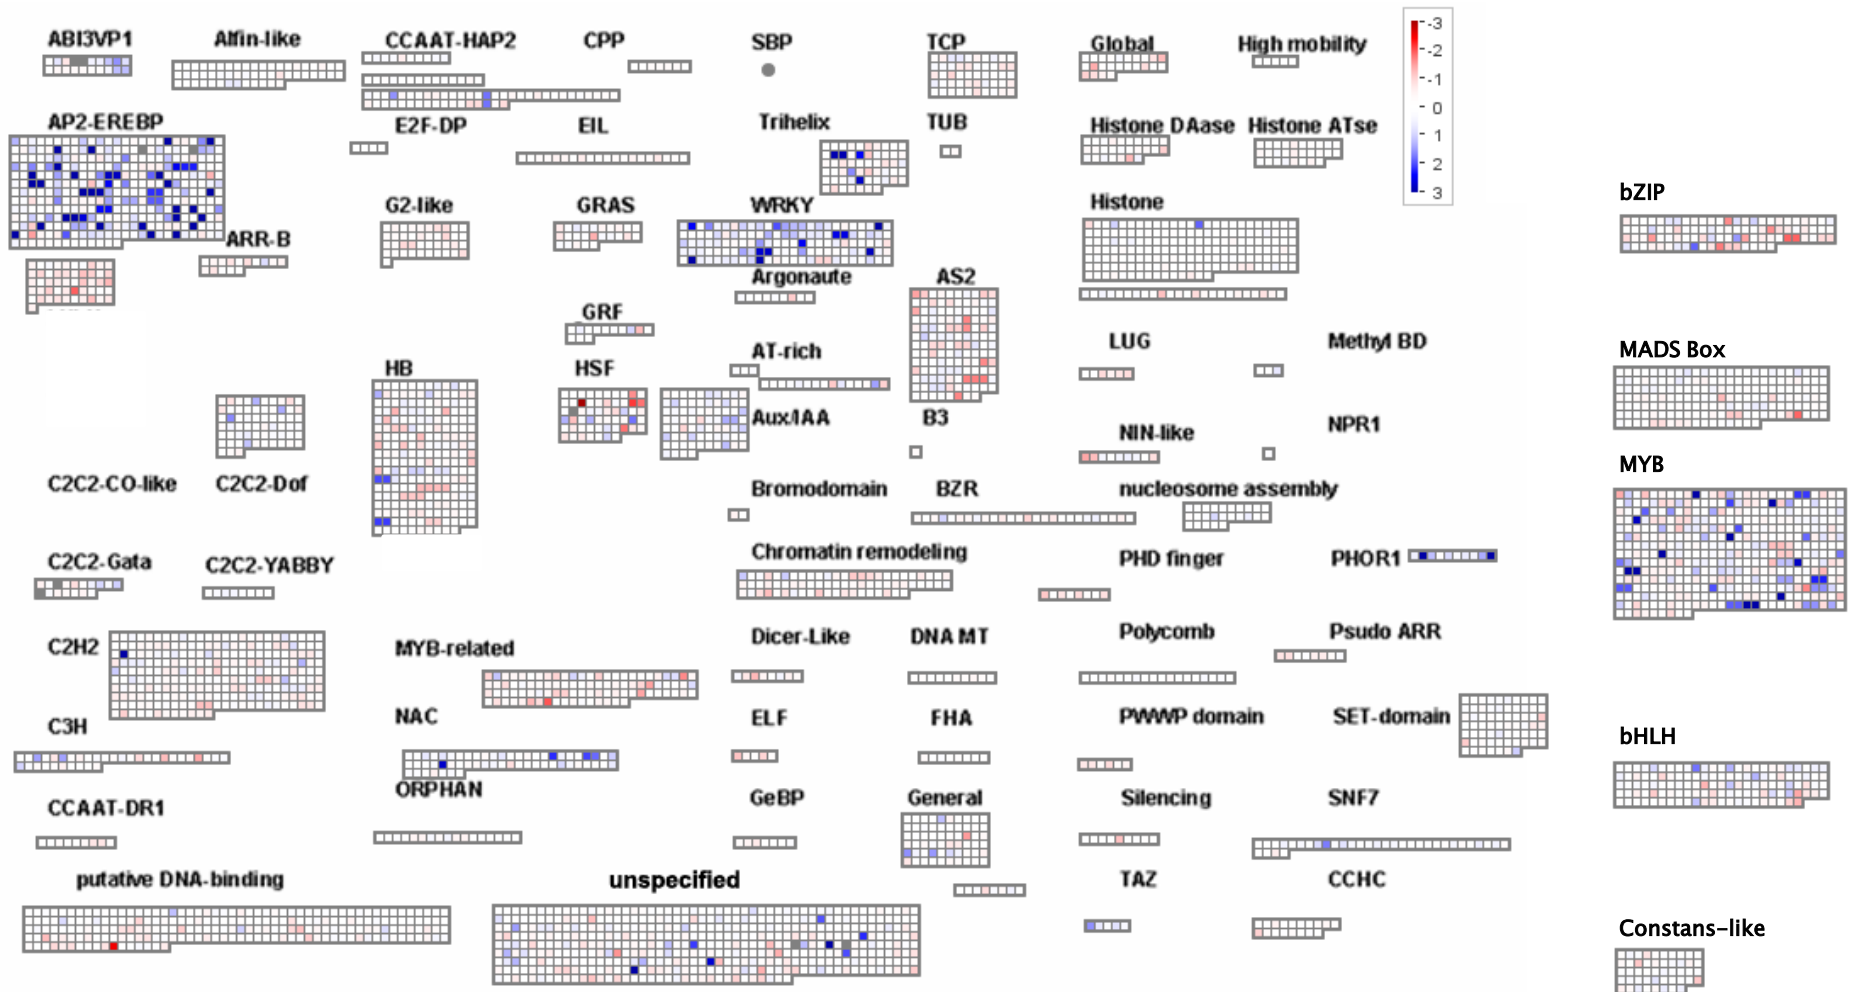

# h. Root 1 hour

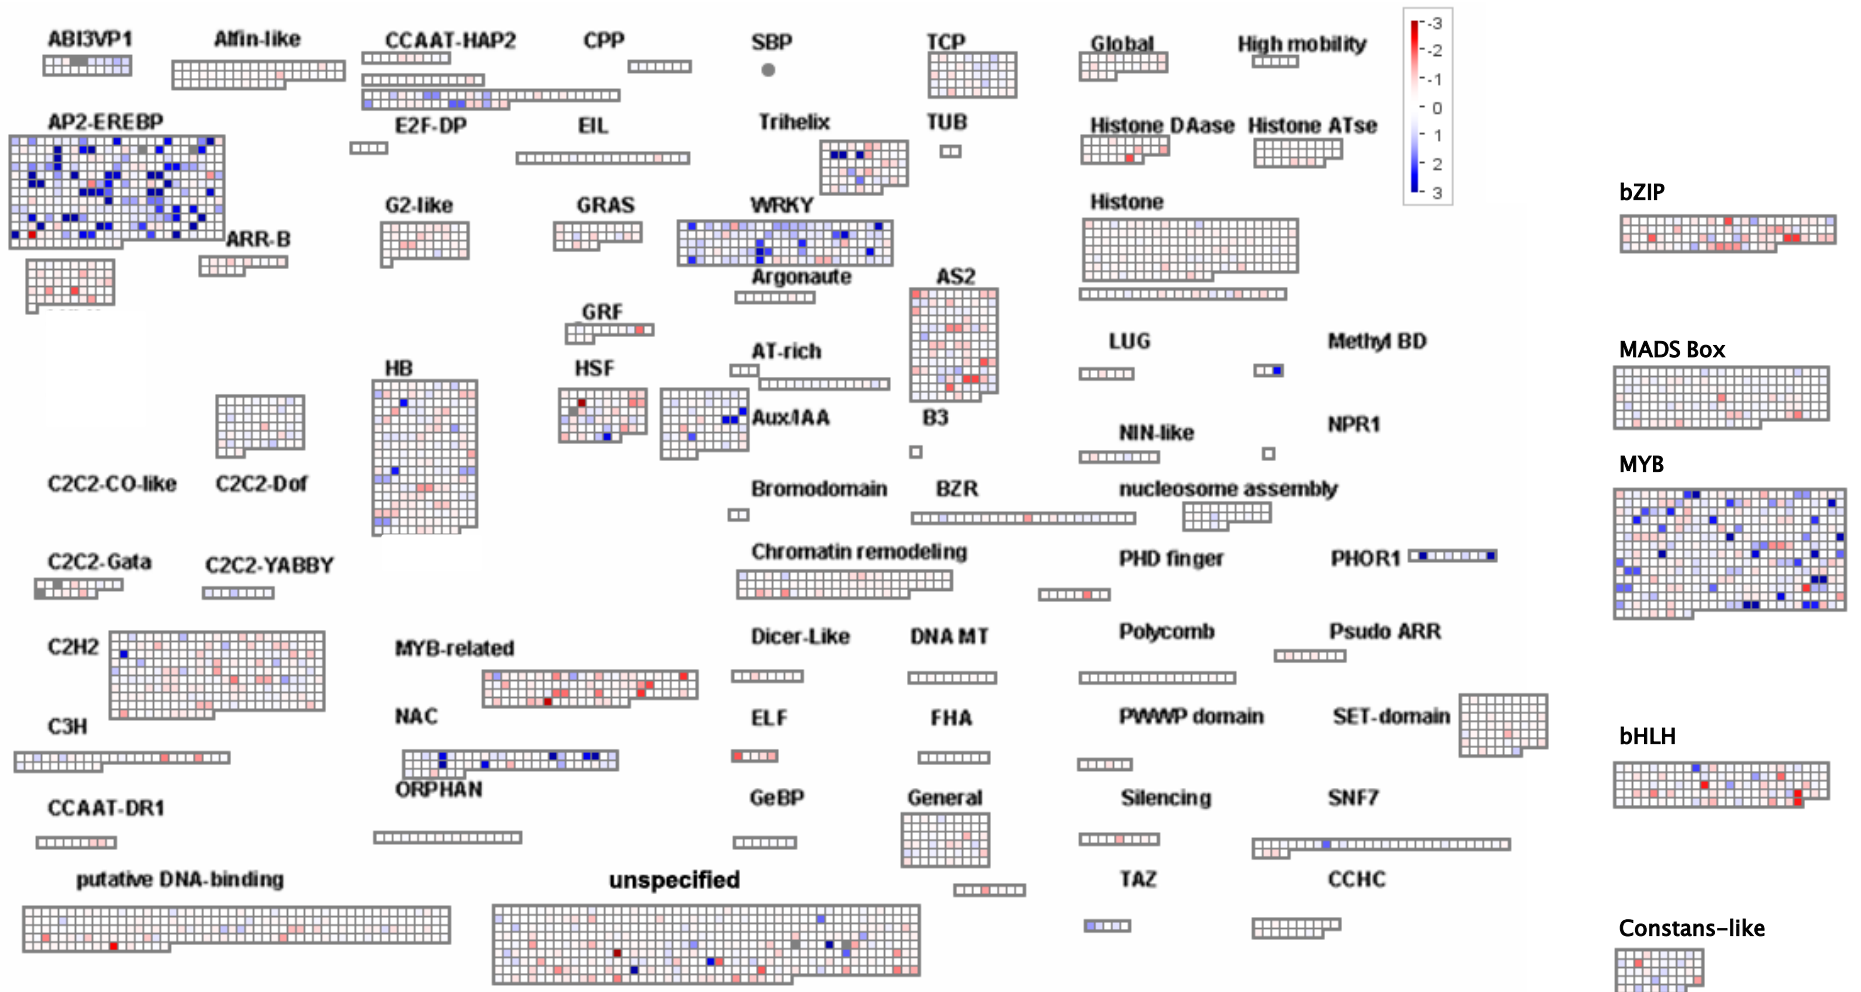



# i. Root 2 hours

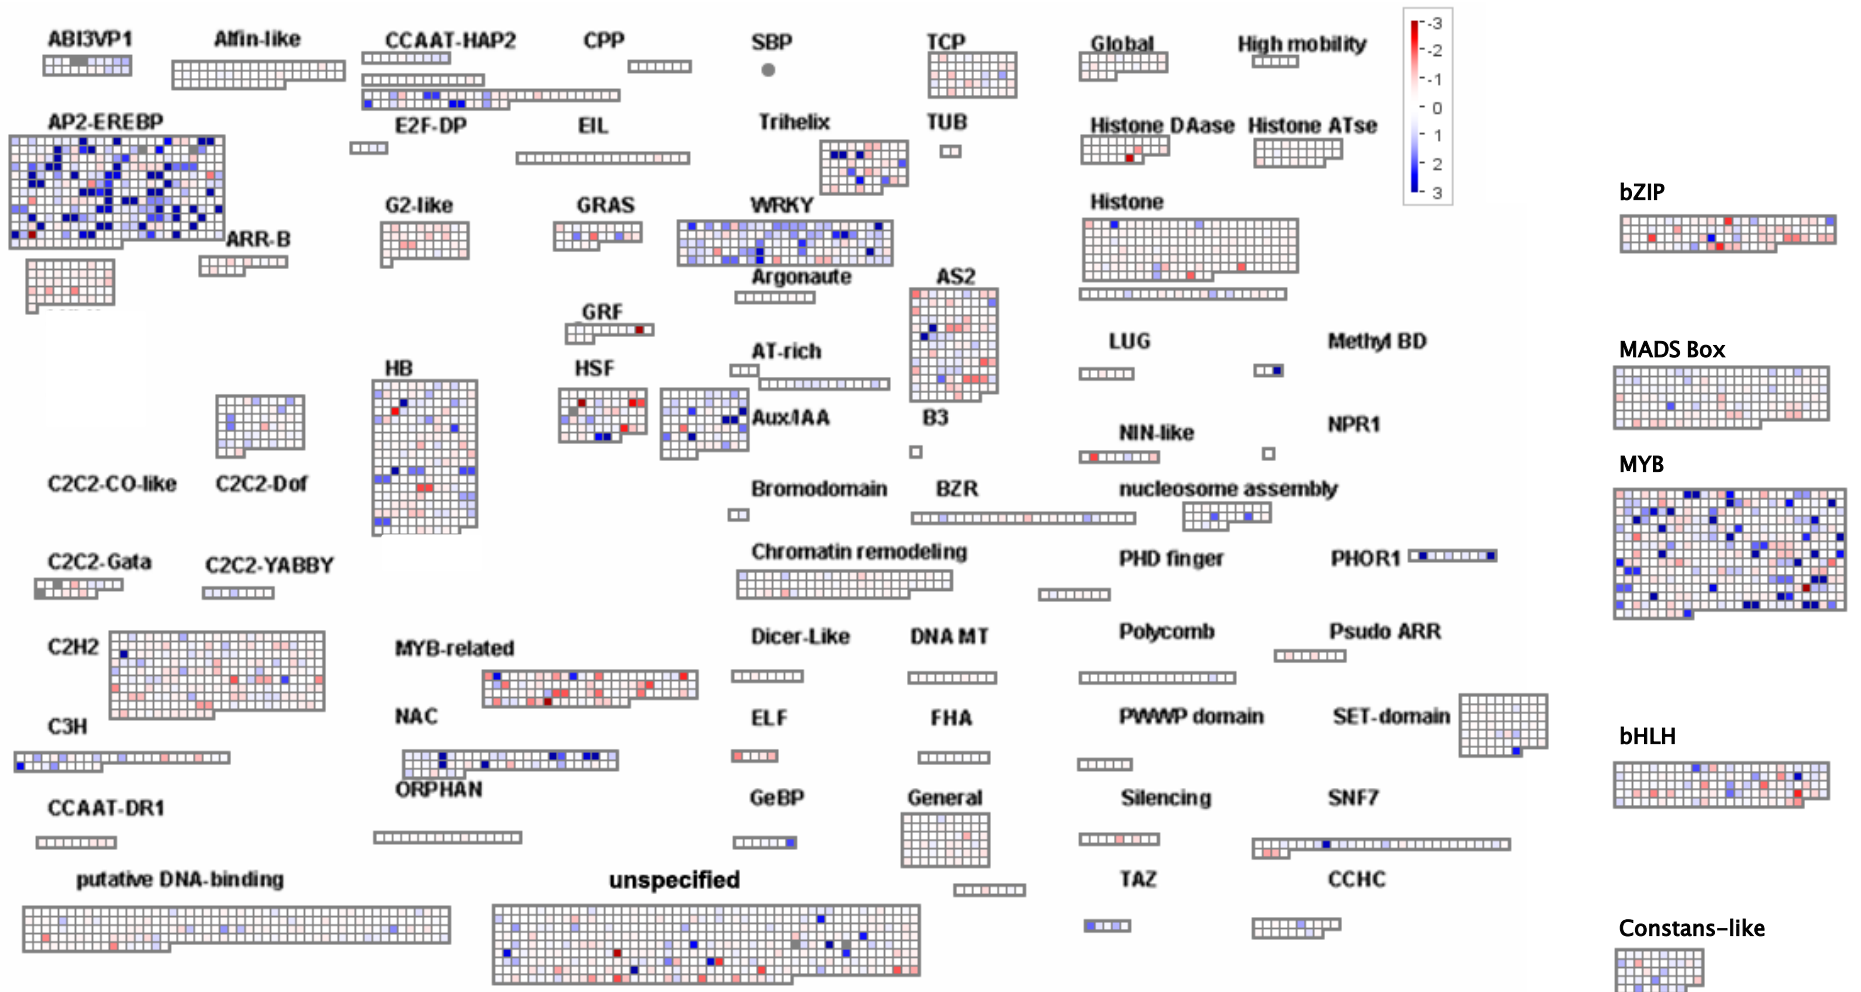

# j. Root 4 hours

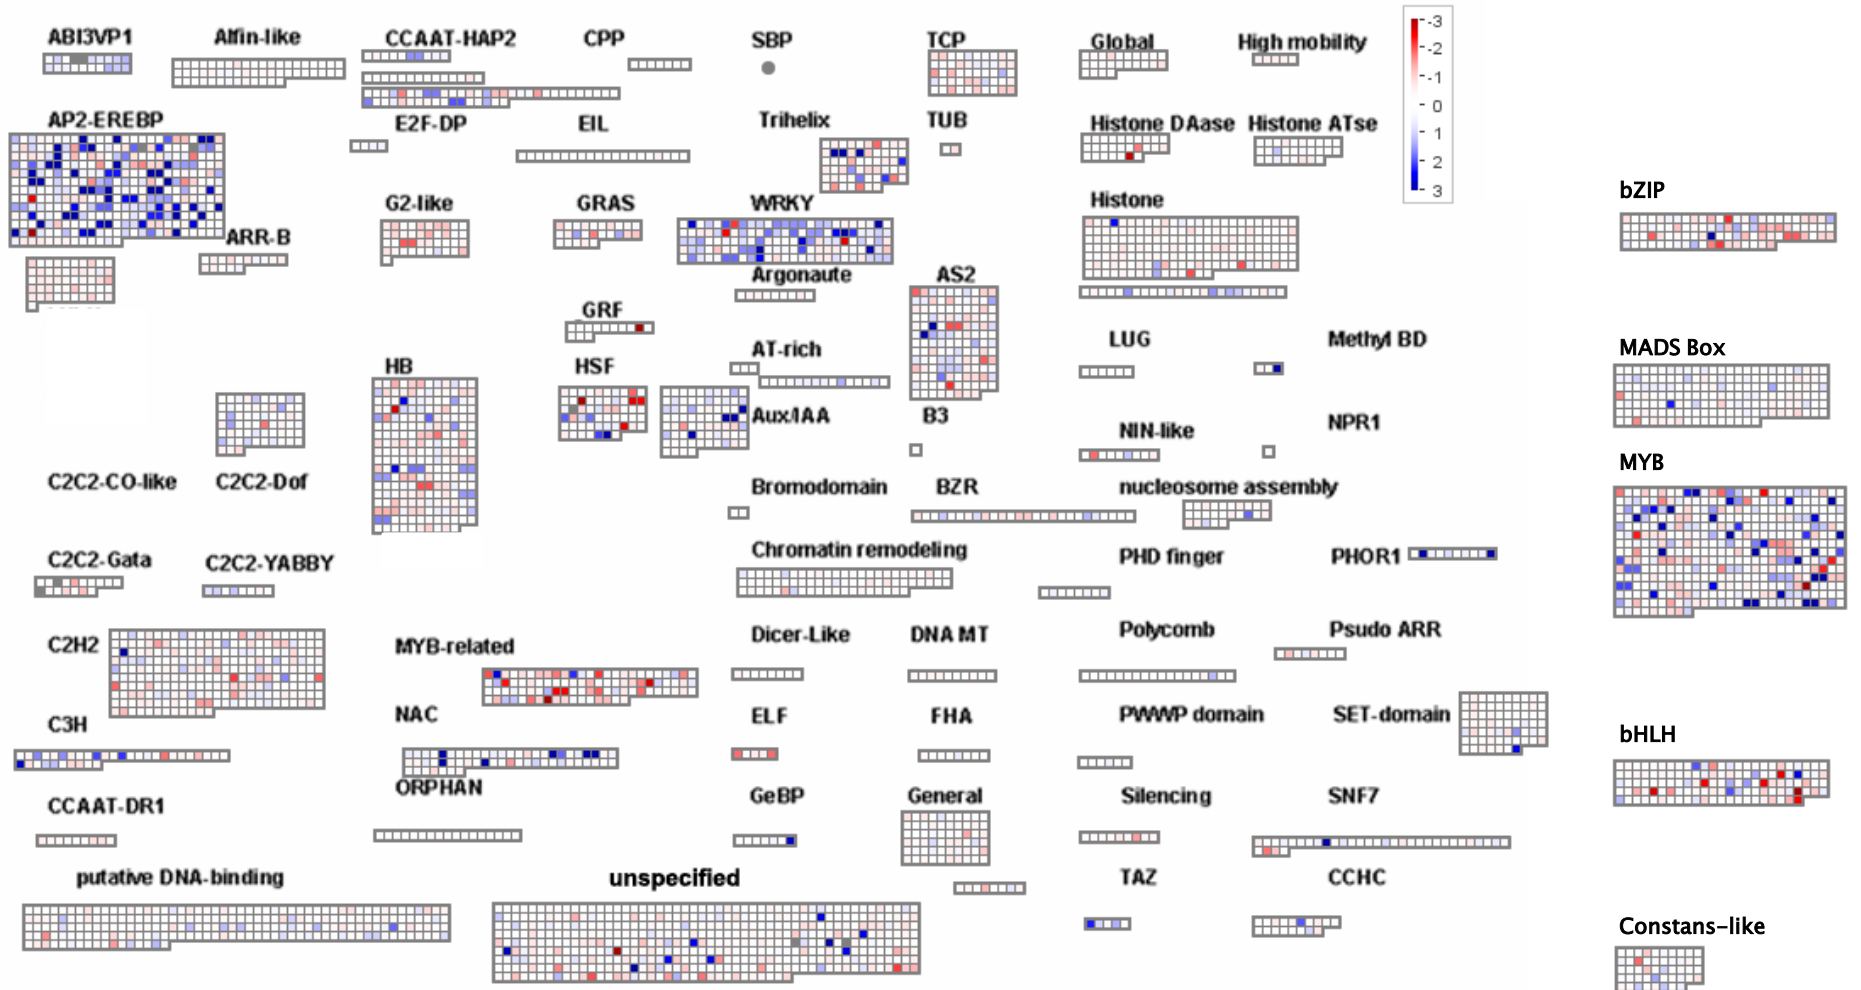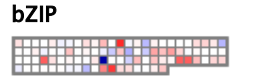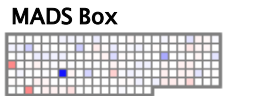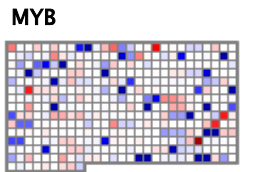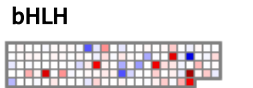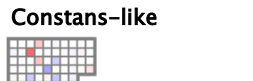

Supplement: 12864_2015_1575_MOESM8_ESM.pdf [file 12864_2015_1575_MOESM8_ESM.pdf]
