# Supplementary material for: Tobacco drought stress responses reveal new targets for Solanaceae crop improvement
Source: PubMed Central journal article supplement (PMC4485875; doi:10.1186/s12864-015-1575-4), 2015-06-30

**A.**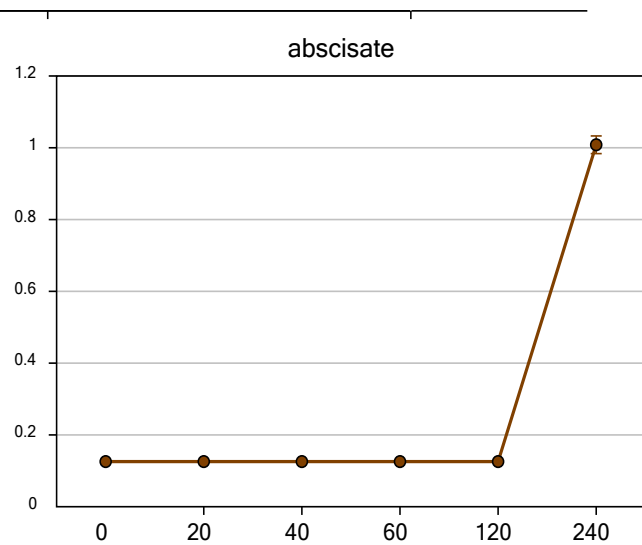**B.**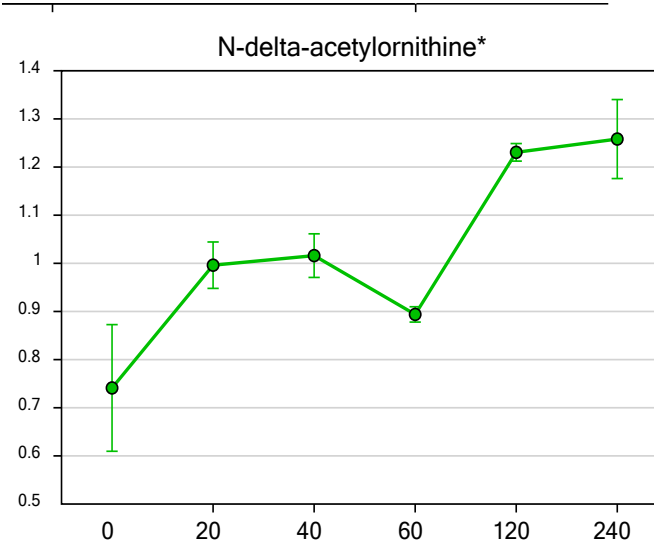**C.**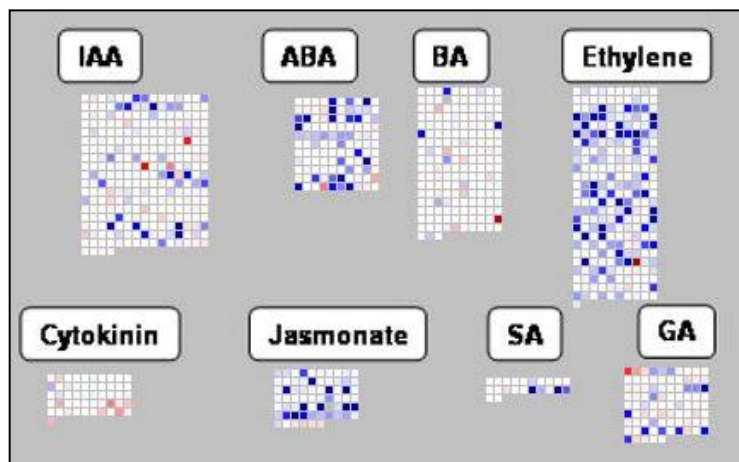**D.**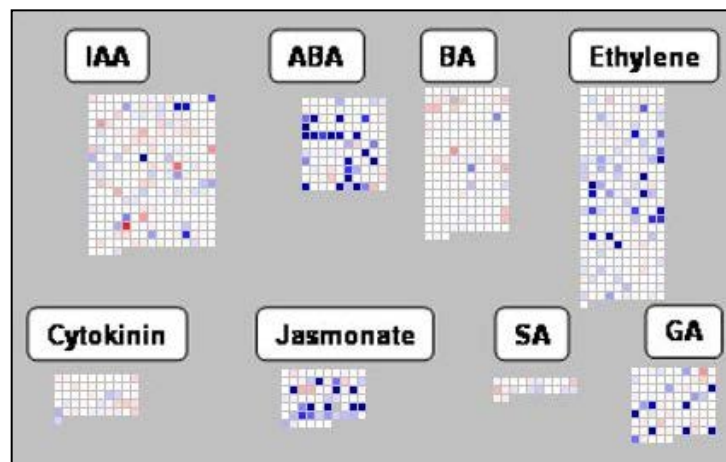

E.

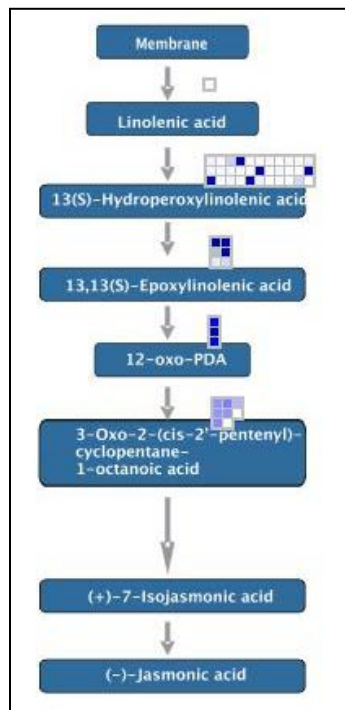

F.

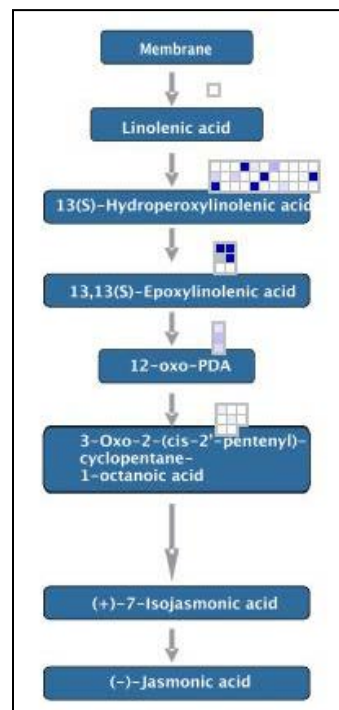

Supplement: 12864_2015_1575_MOESM6_ESM.pdf [file 12864_2015_1575_MOESM6_ESM.pdf]
