# Supplementary material for: Tobacco drought stress responses reveal new targets for Solanaceae crop improvement
Source: PubMed Central journal article supplement (PMC4485875; doi:10.1186/s12864-015-1575-4), 2015-06-30

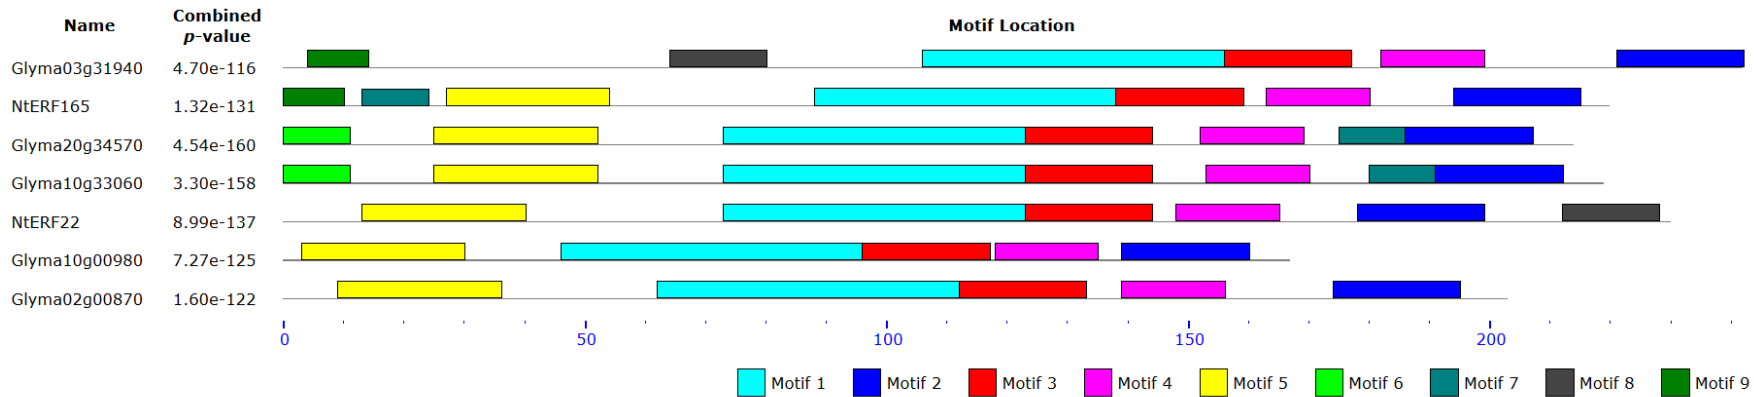

[Motif 1](#) • 1.6e-224  
• 7 sites

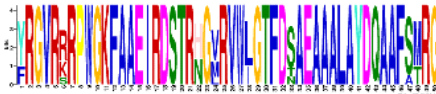

[Motif 6](#) • 3.7e+001  
• 2 sites

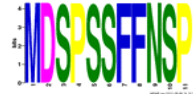

[Motif 2](#) • 1.5e-047  
• 7 sites

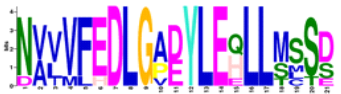

[Motif 7](#) • 5.6e+001  
• 3 sites

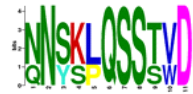

[Motif 3](#) • 2.1e-047  
• 7 sites

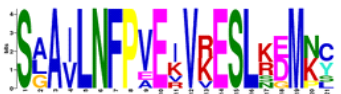

[Motif 8](#) • 1.5e+002  
• 2 sites

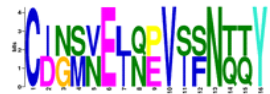

[Motif 4](#) • 7.7e-043  
• 7 sites

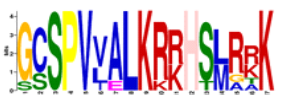

[Motif 9](#) • 6.0e+002  
• 2 sites

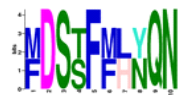

[Motif 5](#) • 1.9e-041  
• 6 sites

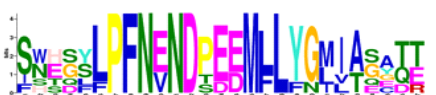

Supplement: 12864_2015_1575_MOESM10_ESM.pdf [file 12864_2015_1575_MOESM10_ESM.pdf]
